# Supplementary material
Source: publisher site journal article supplement (https://www.dovepress.com/article/257057)
Supplement: Supplementary file 1 [file get_supplementary_file.php]

**Supplementary material**

1. The antibodies use in WB

Primary CPA4 (Abcam, dilution: 1:1000), E-cadherin (Abcam, dilution: 1:1000), β-catenin (Proteintech, Chicago, IL, USA, dilution: 1:1000), N-cadherin (N-cad, Proteintech, dilution: 1:500), Vimentin (Proteintech, 10366-1-AP; dilution: 1:2000), Fibronectin (Proteintech, dilution: 1:1000), alpha smooth muscle actin (a-SMA, Abcam, dilution: 1:1000), p-AKT/AKT (Cell Signaling Technology, Beverly, MA, USA, dilution: 1:1000 and 1:2000, respectively), p-PI3K/PI3K (Cell Signaling Technology, dilution: 1:1000 and 1:2000, respectively), p-mTOR/mTOR (Cell Signaling Technology, dilution: 1:1000 and 1:1000, respectively) , Bax/Bcl2 (Proteintech, 1:1000 and 1:1000, respectively), cleaved caspase3 (Cell Signaling, 1:500) and GAPDH (Proteintech, dilution: 1:2000).

1. The prime sequence in qRT-PCR.

The primer sequences were as below: CPA4, 5’- ATTGGACATTCGTTTGAAAACCG‐3’ and 5’- ACGGGAGATCCACTCTCGGGA -3’; E-cad, 5’- CAGCGTGTGTGACTGTGAAG -3’ and 5’ - AAACAGCAAGAGCAGCAGAA -3’. GADPH, 5’- TGACTTCAACAGCGACACCCA -3’ and 5’ - CACCCTGTTGCTGTAGCCAAA -3’.

1. The sequence of CPA4siRNA

Two verified sequence (OPF) of CPA4siRNA were as followed:

1. CAACGGCATCAAATTTGCATTCACA;

2. CGGCATCAAATTTGCATTCACATTT.


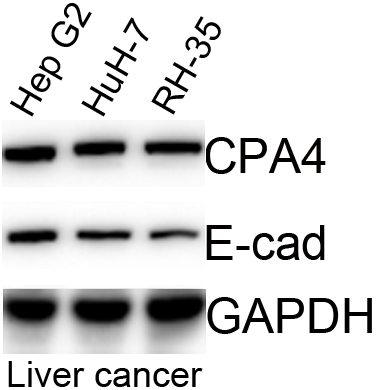


Supplemental Figure 1. CPA4 and E-cad expression in liver cancer cell lines. CPA4: Carboxypeptidase A4; E-cad: E-cadherin.
